# Supplementary material for: Relationships of Body Mass Index, Relative Fat Mass Index, and Waist Circumference with Serum Concentrations of Parameters of Chronic Inflammation
Source: MDPI journal article supplement (doi:10.3390/nu15122789), 2023-06-18
Supplement: s1 [file s1]

**Table S1.** General characteristics of the population studied.

| Variables         |                                     |           | Premenopausal women<br>(n = 44) |       | Postmenopausal women<br>(n = 128) |        | chi <sup>2</sup> | p-value |
|-------------------|-------------------------------------|-----------|---------------------------------|-------|-----------------------------------|--------|------------------|---------|
|                   |                                     |           | n                               | %     | n                                 | %      |                  |         |
| BMI               | underweight                         | < 18.5    | 1                               | 2.27  | 0                                 | 0.00%  | 4.018            | 0.259   |
|                   | normal weight                       | 18.5-24.9 | 14                              | 31.82 | 32                                | 25.00% |                  |         |
|                   | overweight                          | 25.0-29.9 | 17                              | 38.64 | 52                                | 40.63% |                  |         |
|                   | obesity                             | ≥ 30      | 12                              | 27.27 | 44                                | 34.38% |                  |         |
| WC                | android body type                   | ≥ 80 cm   | 11                              | 25.00 | 29                                | 22.66% | 0.101            | 0.751   |
|                   | gynoid body type                    | < 80 cm   | 33                              | 75.00 | 99                                | 77.34% |                  |         |
| RFM               | average                             | 25-31     | 6                               | 13.64 | 14                                | 10.94% | 0.232            | 0.630   |
|                   | obese                               | 32+       | 38                              | 86.36 | 114                               | 89.06% |                  |         |
| VAI               | no adipose tissue dysfunction (ATD) |           | 35                              | 79.55 | 94                                | 73.44% | 3.363            | 0.339   |
|                   | mild ATD                            |           | 1                               | 2.27  | 14                                | 10.94% |                  |         |
|                   | moderate ATD                        |           | 4                               | 9.09  | 12                                | 9.38%  |                  |         |
|                   | severe ATD                          |           | 4                               | 9.09  | 8                                 | 6.25%  |                  |         |
| WHtR              | slim                                | < 0.46    | 8                               | 18.18 | 16                                | 12.50% | 2.471            | 0.650   |
|                   | healthy                             | 0.47-0.49 | 7                               | 15.91 | 13                                | 10.16% |                  |         |
|                   | overweight                          | 0.50-0.54 | 11                              | 25.00 | 33                                | 25.78% |                  |         |
|                   | very overweight                     | 0.55-0.58 | 6                               | 13.64 | 23                                | 17.97% |                  |         |
|                   | obese                               | 0.55-0.58 | 12                              | 27.27 | 43                                | 33.59% |                  |         |
| Abdominal obesity |                                     | no        | 22                              | 50.00 | 57                                | 44.53  | 0.394            | 0.530   |
|                   |                                     | yes       | 22                              | 50.00 | 71                                | 55.47  |                  |         |
| General obesity   |                                     | no        | 30                              | 68.18 | 84                                | 65.63  | 0.096            | 0.757   |
|                   |                                     | yes       | 14                              | 31.82 | 44                                | 34.38  |                  |         |

BMI—body mass index, WC—waist circumference, RFM—relative fat mass, VAI—visceral adiposity index, WHtR—waist-to-height ratio.
